# Supplementary material
Source: publisher figshare collection journal article supplement (https://sage.figshare.com/ndownloader/files/31643133)
Supplement: Supplementary file 1 [file 31643133]

**Supporting Information**

**Natural Cembrane Diterpenoids from the Soft Coral *Sinularla querciformis***

Yi-Ying Wu,1 Chia-Ching Hsieh,1 Chia-Ying Li,1 Wen-Huei Chang,1 Jih-Jung Chen,2 Kuei-Hung Lai,3,4,5 Zhi-Hong Wen,6 and Hsu-Ming Chung,1,*

| **Table of Contents** | **Page** |
| --- | --- |
| **Figure S1:** IR Spectrum of **1** in CDCl3 | 2 |
| **Figure S2:** ESIMS spectrum of **1** | 2 |
| **Figure S3:** HRESIMS spectrum of **1** | 3 |
| **Figure S4:** 1H-NMR Spectrum of **1** in CDCl3 (400 MHz) | 3 |
| **Figure S5:** 13C-NMR Spectrum of **1** in CDCl3 (100 MHz) | 4 |
| **Figure S6:**DEPT Spectrum of **1** in CDCl3 | 4 |
| **Figure S7:** HMQC Spectrum of **1** in CDCl3 | 5 |
| **Figure S8:** COSY Spectrum of **1** in CDCl3 | 5 |
| **Figure S9:** HMBC Spectrum of **1** in CDCl3 | 6 |
| **Figure S10:** NOESY Spectrum of **1** in CDCl3 | 6 |

|  |
| --- |
| 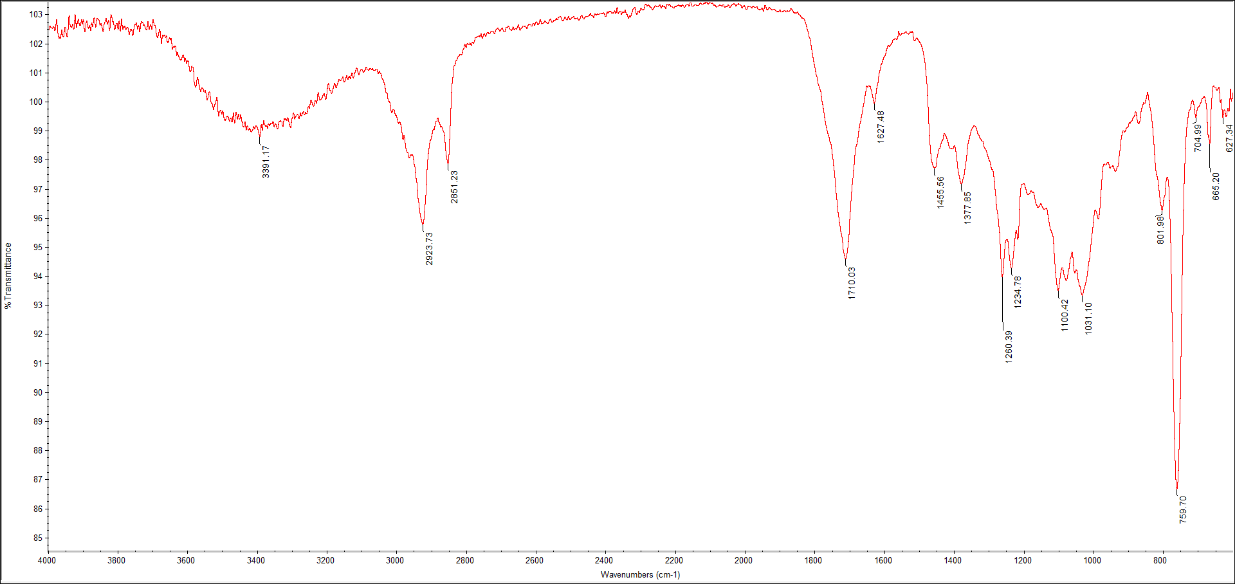 |
| **Figure S1:** IR Spectrum of **1** in CDCl3 |
|  |
|  |
| **Figure S2:** ESIMS spectrum of **1** |
|  |
| **Figure S3:** HRESIMS spectrum of **1** |
| 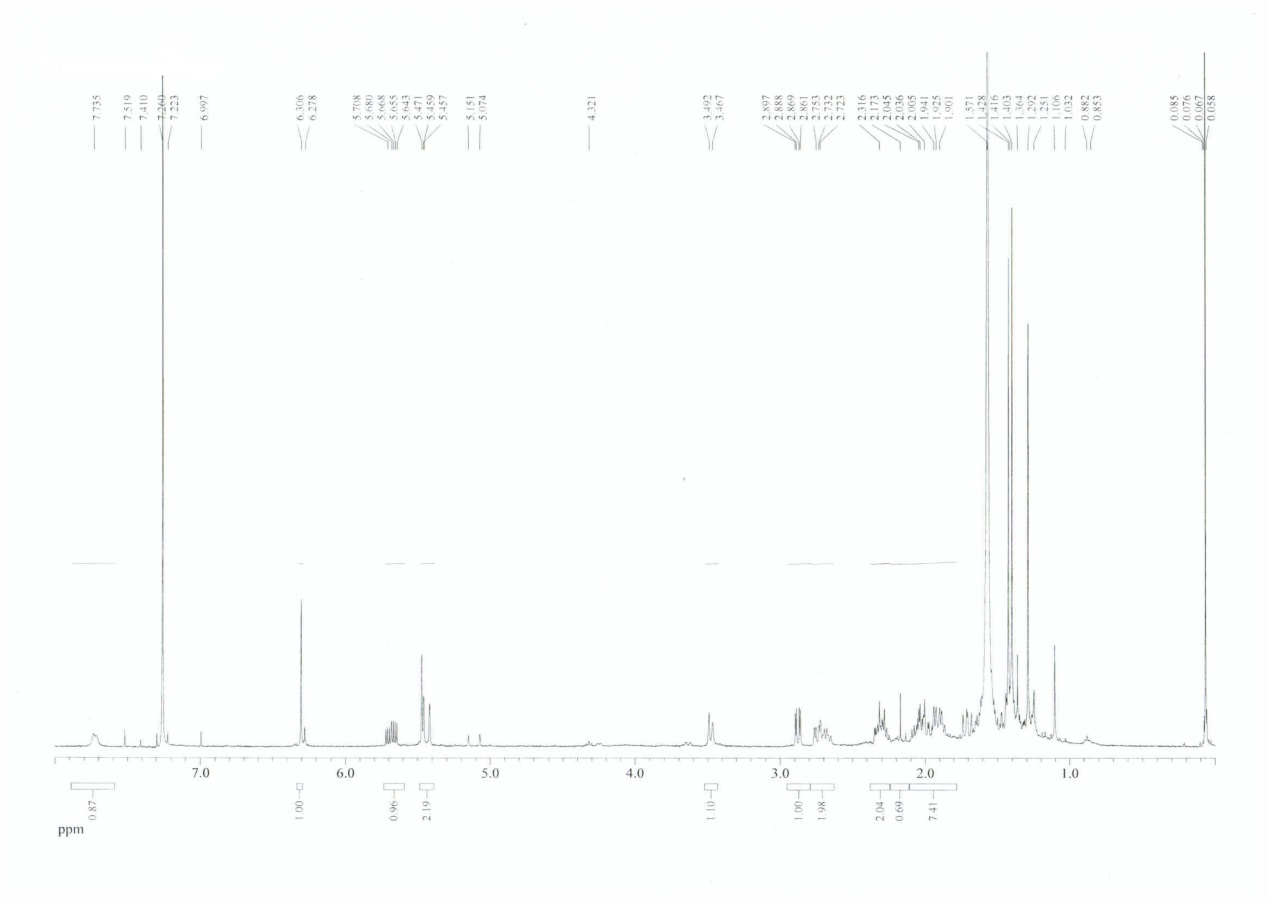 |
| **Figure S4:** 1H-NMR Spectrum of **1** in CDCl3 (400 MHz) |
|  |
| 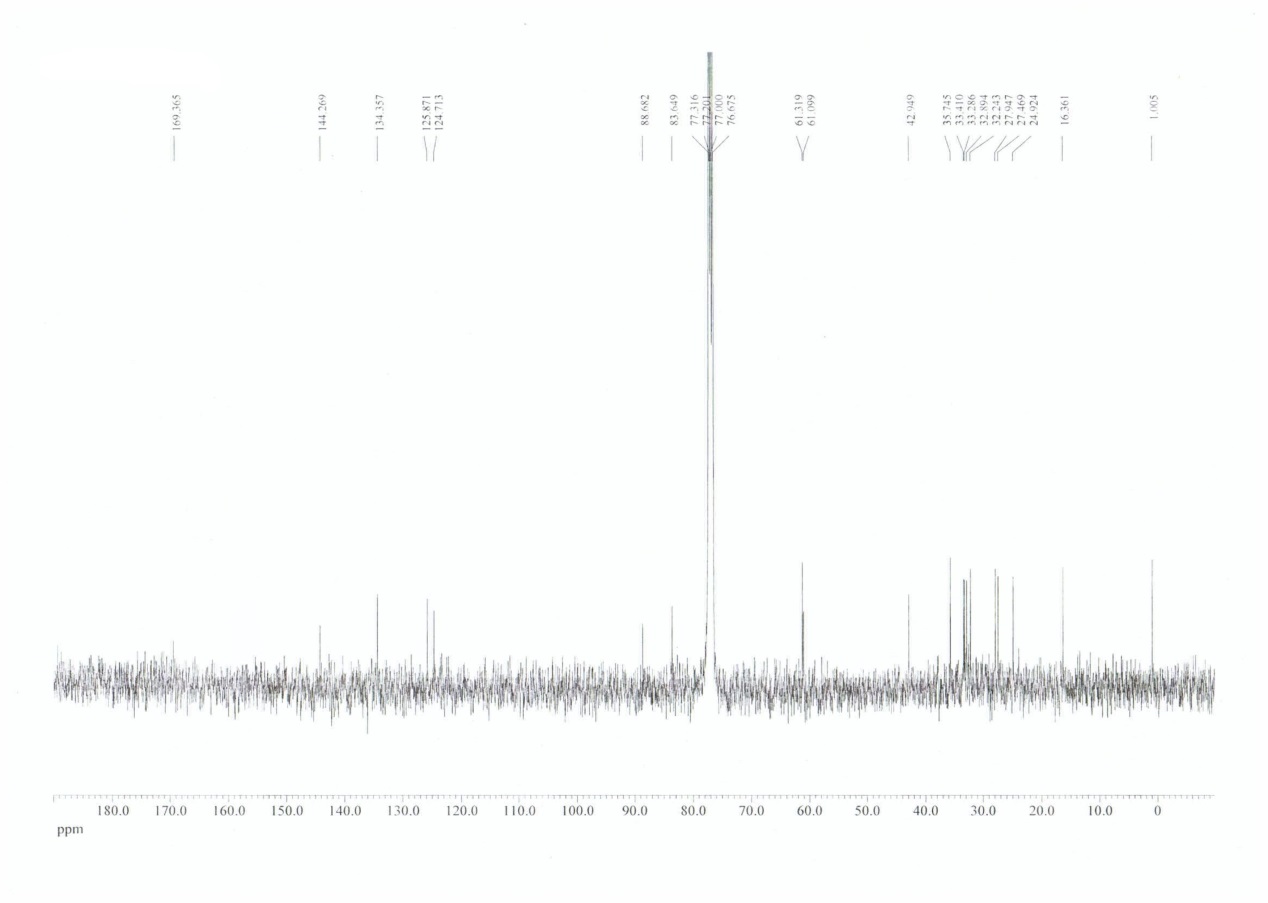 |
| **Figure S5:** 13C-NMR Spectrum of **1** in CDCl3 (100 MHz) |
| 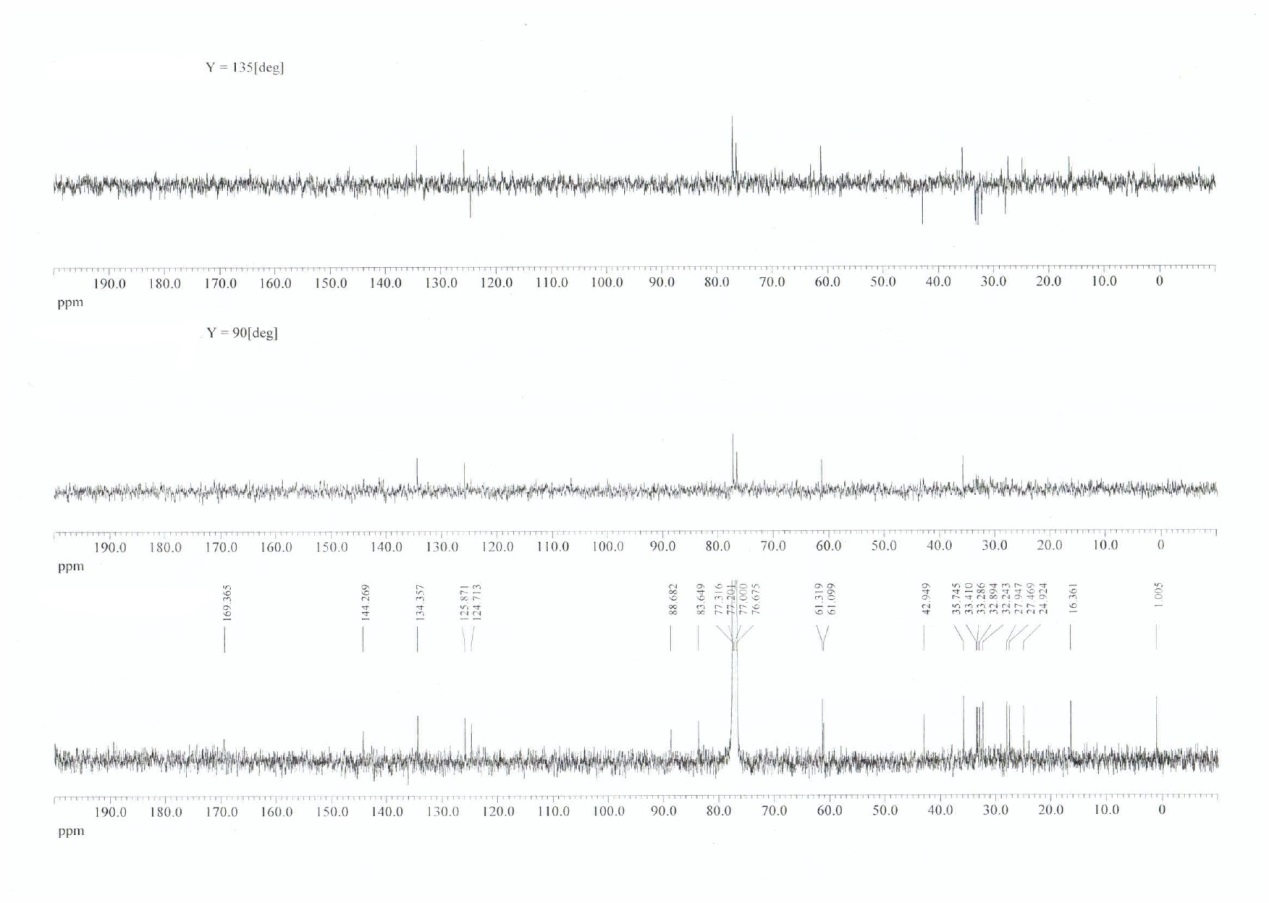 |
| **Figure S6:** DEPT Spectrum of **1** in CDCl3 |
|  |
| 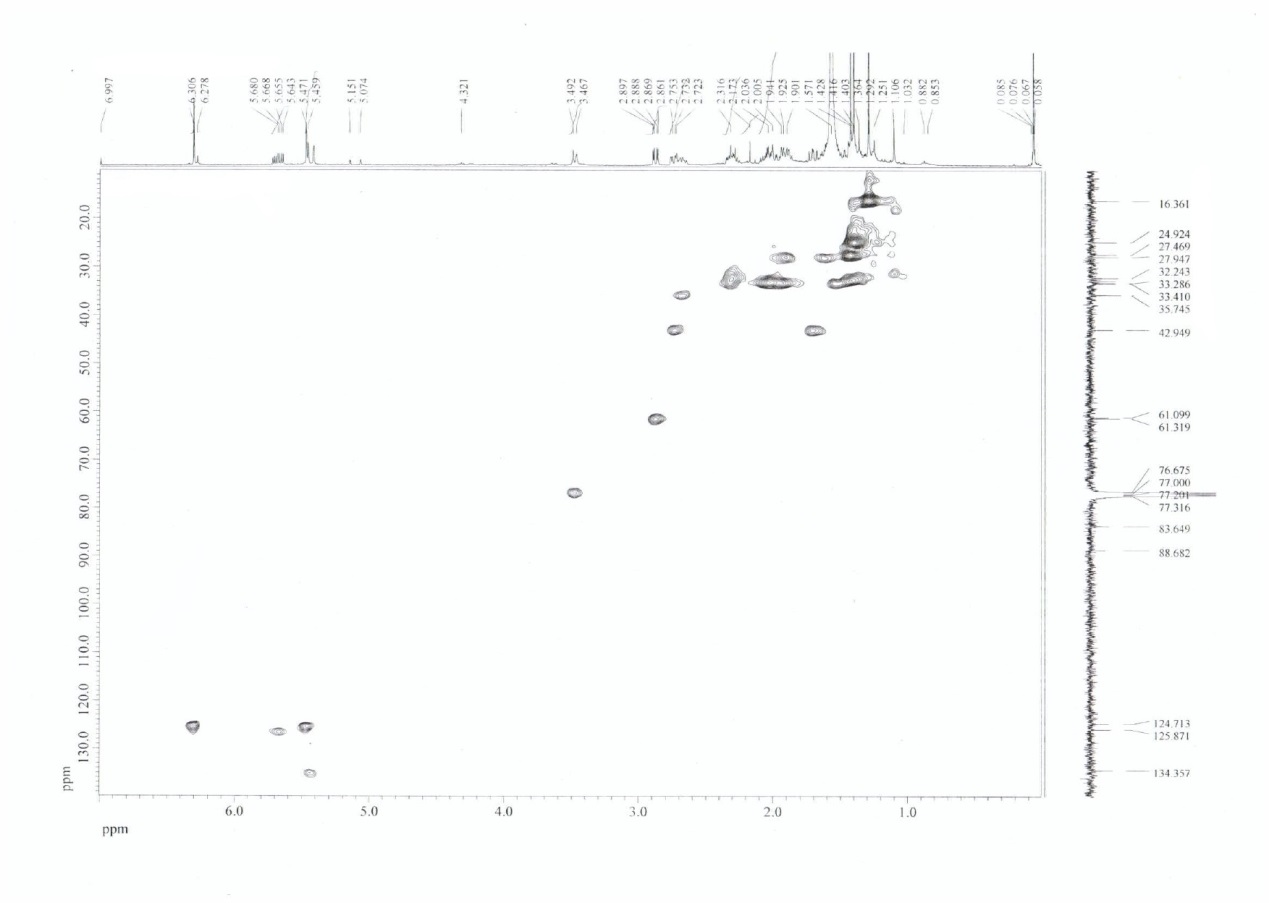 |
| **Figure S7:** HMQC Spectrum of **1** in CDCl3 |
| 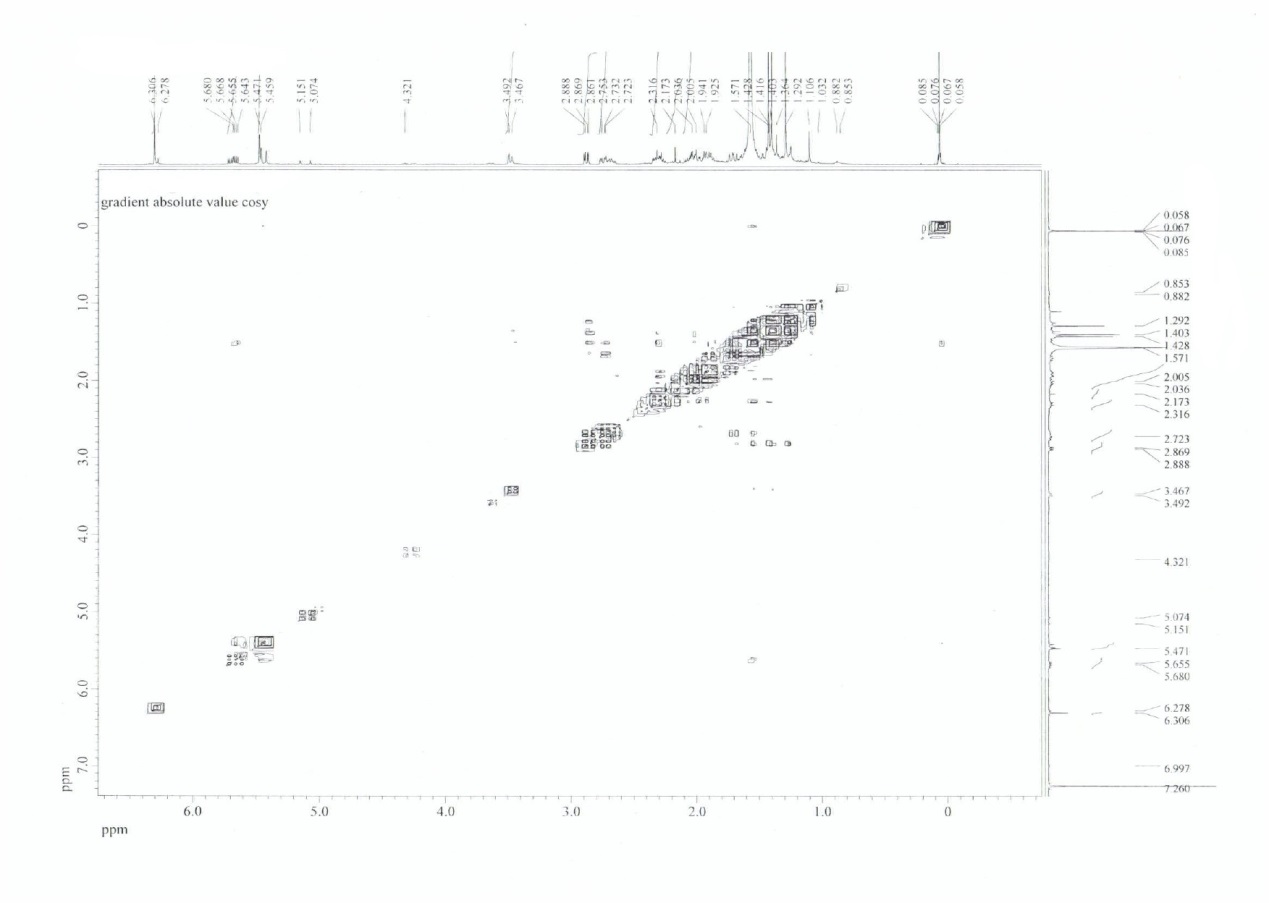 |
| **Figure S8:** COSY Spectrum of **1** in CDCl3 |
| 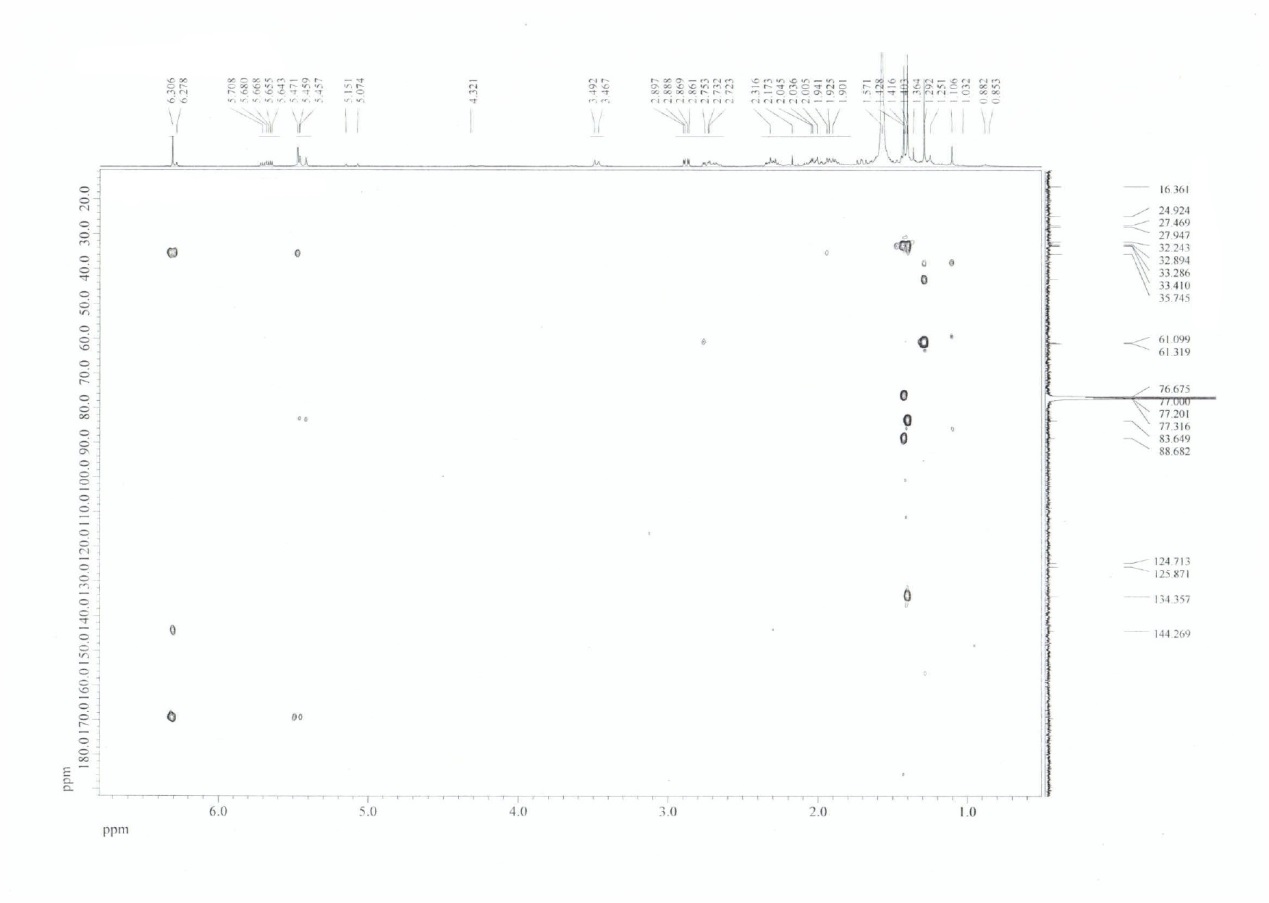 |
| **Figure S9:** HMBC Spectrum of **1** in CDCl3 |
| **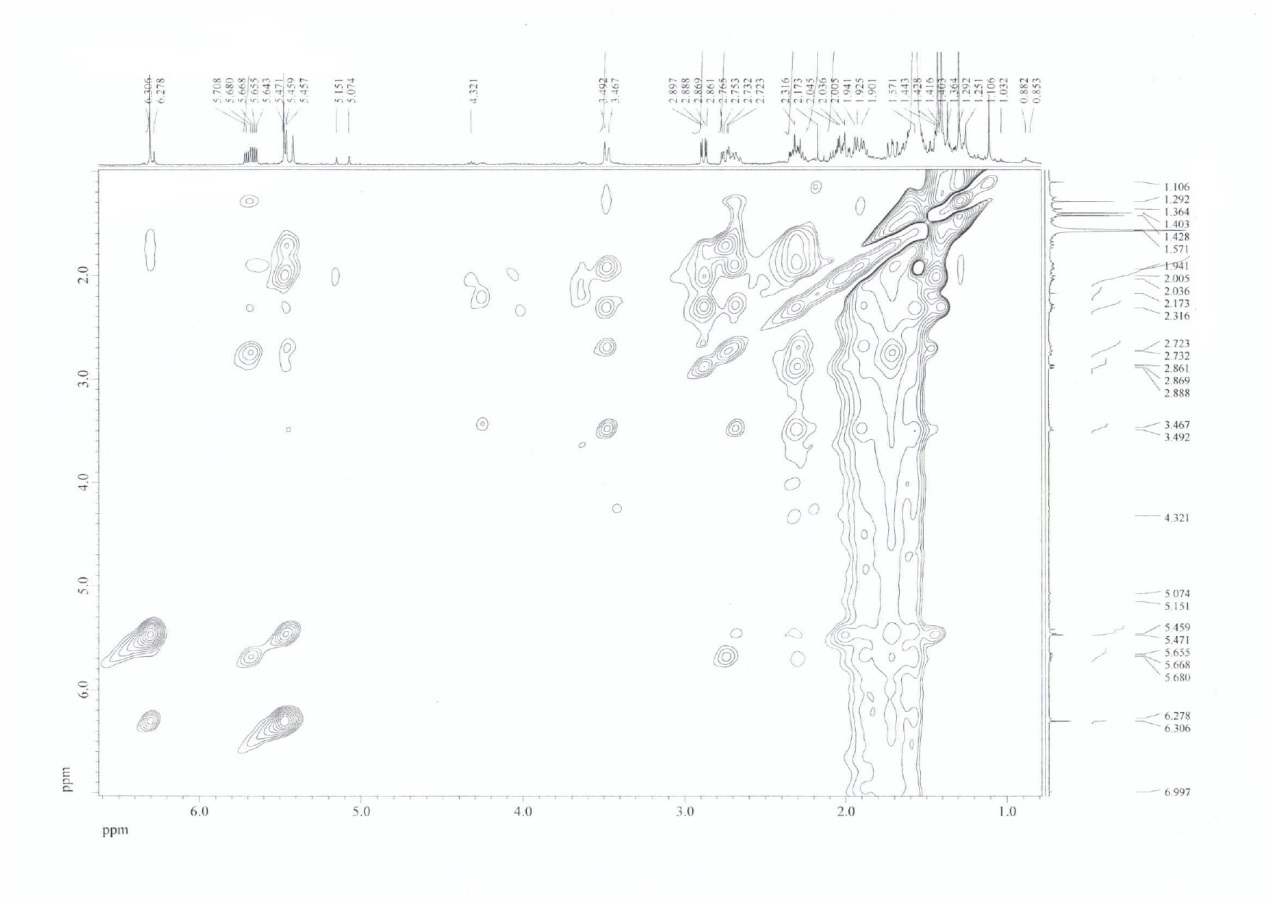** |
| **Figure S10:** NOESY Spectrum of **1** in CDCl3 |
